# Supplementary material
Source: PubMed Central journal article supplement (PMC3272775)
Supplement: NIHMS347939-supplement-1_si_001.pdf [file NIHMS347939-supplement-1_si_001.pdf]

# Supporting information

## Identification of Novel $\alpha 4\beta 2$ -Nicotinic Acetylcholine Receptor (nAChR) Agonists Based on an Isoxazole Ether Scaffold that Demonstrate Antidepressant-like Activity

*Li-Fang Yu,<sup>†</sup> Werner Tückmantel,<sup>§</sup> J. Brek Eaton,<sup>‡</sup> Barbara Caldarone,<sup>§</sup> Allison Fedolak,<sup>§</sup> Taleen Hanania,<sup>§</sup> Dani Brunner,<sup>#,§</sup> Ronald J. Lukas,<sup>‡</sup> Alan P. Kozikowski<sup>\*,†</sup>*

<sup>†</sup>Drug Discovery Program, Department of Medicinal Chemistry and Pharmacognosy, University of Illinois at Chicago, 833 South Wood Street, Chicago, Illinois 60612, United States

<sup>‡</sup>Division of Neurobiology, Barrow Neurological Institute, 350 West Thomas Road, Phoenix, Arizona 85013, United States

<sup>§</sup>PsychoGenics, Inc., 765 Old Saw Mill River Road, Tarrytown, New York 10591, United States

<sup>#</sup>Dept. of Psychiatry, Columbia University, NYSPI, 1051 Riverside Drive, New York 10032, United States

Phone: +1-312-996-7577; fax: +1-312-996-7107 ; e-mail: [kozikowa@uic.edu](mailto:kozikowa@uic.edu).

### List of Contents

|                                                                      |    |
|----------------------------------------------------------------------|----|
| Broad Screening at Other Neurotransmitter Receptors and Transporters | S2 |
| Preliminary <i>in vitro</i> ADME-Tox                                 | S2 |

## Broad Screening at Other Neurotransmitter Receptors and Transporters

**Table 1.** Primary binding competition efficacies (%) of compound **43** at various neurotransmitter receptors and transporters<sup>a</sup>

| Target     | Serotonergic Receptors        |                    |                    |                           |                        |                    |                    |                   |                    |
|------------|-------------------------------|--------------------|--------------------|---------------------------|------------------------|--------------------|--------------------|-------------------|--------------------|
|            | 5-HT <sub>1A</sub>            | 5-HT <sub>1B</sub> | 5-HT <sub>1D</sub> | 5-HT <sub>1E</sub>        | 5-HT <sub>2A</sub>     | 5-HT <sub>2B</sub> | 5-HT <sub>2C</sub> | 5-HT <sub>3</sub> | 5-HT <sub>5A</sub> |
| Inhibition | 16.4                          | 5.8                | 1.3                | 1.3                       | 3.5                    | 9.8                | 1.2                | 0.6               | 4.8                |
| Target     | Serotonergic Receptors        |                    | GABA               |                           | Dopaminergic Receptors |                    |                    |                   | BZPR <sup>c</sup>  |
|            | 5-HT <sub>6</sub>             | 5-HT <sub>7</sub>  | GABA <sub>A</sub>  | D <sub>1</sub>            | D <sub>2</sub>         | D <sub>3</sub>     | D <sub>4</sub>     | D <sub>5</sub>    |                    |
| Inhibition | -4.9 <sup>b</sup>             | 14.3               | 30.1               | 14.6                      | 14.7                   | -0.8               | 13.1               | 10.8              | 44.7               |
| Target     | Adrenergic Receptors          |                    |                    |                           |                        |                    |                    |                   |                    |
|            | α <sub>1A</sub>               | α <sub>1B</sub>    | α <sub>1D</sub>    | α <sub>2A</sub>           | α <sub>2B</sub>        | α <sub>2C</sub>    | β <sub>1</sub>     | β <sub>2</sub>    | β <sub>3</sub>     |
| Inhibition | -8.4                          | -0.3               | -0.5               | 15.5                      | 31.1                   | 30.2               | 6.5                | -1.3              | 21.9               |
| Target     | Histaminergic Receptors       |                    |                    |                           | Muscarinic Receptors   |                    |                    |                   |                    |
|            | H <sub>1</sub>                | H <sub>2</sub>     | H <sub>3</sub>     | H <sub>4</sub>            | M <sub>1</sub>         | M <sub>2</sub>     | M <sub>3</sub>     | M <sub>4</sub>    | M <sub>5</sub>     |
| Inhibition | -9.7                          | 20.1               | 14.7               | -2.5                      | -3.7                   | 4.2                | -9.5               | -9.4              | -2.3               |
| Target     | Opioid Receptors <sup>d</sup> |                    |                    | Transporters <sup>e</sup> |                        |                    | Sigma Receptors    |                   |                    |
|            | DOR                           | KOR                | MOR                | DAT                       | NET                    | SERT               | σ 1                | σ 2               |                    |
| Inhibition | 16.2                          | 4.5                | 21.8               | 48.5                      | 5.2                    | -6.1               | 19.7               | 24.6              |                    |

<sup>a</sup> The default concentration for primary binding experiments is 10 μM (n = 4). For details see Experimental Section. <sup>b</sup> Negative inhibition represents a stimulation of binding. <sup>c</sup> BZPR: Benzodiazepine Receptors (rat brain site). <sup>d</sup> DOR: Delta Opioid Receptor; KOR: Kappa Opioid Receptor; MOR: Mu Opioid Receptor. <sup>e</sup> DAT: Dopamine Transporter; NET: Norepinephrine Transporter; SERT: Serotonin Transporter.

## Preliminary *in vitro* ADME-Tox Profile

**Table 2.** Effect of compound **43** on *in vitro* CYP activity in human liver microsomes<sup>a</sup>

| Inhibitor<br>Test Article | Conc<br>μM | 1A2<br>(Phenacetin) |      | 2B6<br>(Bupropion)    |     | 2C9<br>(Diclofenac) |     | 2C19<br>(Mephenytoin) |     |
|---------------------------|------------|---------------------|------|-----------------------|-----|---------------------|-----|-----------------------|-----|
|                           |            | Mean                | SD   | Mean                  | SD  | Mean                | SD  | Mean                  | SD  |
| Furafylline               | 10         | 42.9                | 1.4  | 98.0                  | 5.8 | 101.8               | 3.2 | 93.5                  | 1.0 |
| ThioTEPA                  | 10         | 85.6                | 2.0  | 34.4                  | 1.1 | 93.2                | 9.5 | 97.9                  | 3.1 |
| Sulfaphenazole            | 3          | 90.2                | 1.1  | 93.6                  | 2.2 | 13.2                | 0.7 | 92.5                  | 8.8 |
| Tranlycypromine           | 10         | 74.1                | 2.9  | 20.3                  | 1.3 | 76.2                | 5.0 | 71.5                  | 2.6 |
| Quinidine                 | 2          | 105.3               | 4.6  | 100.9                 | 3.5 | 93.2                | 4.4 | 95.5                  | 0.3 |
| Ketoconazole              | 5          | 71.1                | 1.5  | 36.2                  | 0.5 | 68.4                | 1.2 | 71.1                  | 4.6 |
| Compound <b>43</b>        | 1          | 96.1                | 2.3  | 96.3                  | 2.1 | 90.6                | 4.5 | 99.8                  | 0.6 |
| Compound <b>43</b>        | 10         | 101.4               | 10.4 | 103.0                 | 8.0 | 100.3               | 8.8 | 104.6                 | 8.4 |
| Inhibitor<br>Test Article | Conc<br>μM | 2D6<br>(Bufuralol)  |      | 3A4<br>(Testosterone) |     | 3A4<br>(Midazolam)  |     |                       |     |
|                           |            | Mean                | SD   | Mean                  | SD  | Mean                | SD  |                       |     |
| Furafylline               | 10         | 95.1                | 6.3  | 98.8                  | 2.9 | 101.9               | 2.2 |                       |     |
| ThioTEPA                  | 10         | 86.5                | 1.6  | 88.6                  | 3.7 | 89.7                | 1.3 |                       |     |
| Sulfaphenazole            | 3          | 84.2                | 2.0  | 101.7                 | 1.8 | 100.8               | 3.7 |                       |     |
| Tranlycypromine           | 10         | 77.7                | 8.7  | 93.4                  | 1.5 | 97.4                | 2.3 |                       |     |

|                    |    |       |     |       |     |       |     |
|--------------------|----|-------|-----|-------|-----|-------|-----|
| Quinidine          | 2  | 22.3  | 1.0 | 97.6  | 3.1 | 98.1  | 2.5 |
| Ketoconazole       | 5  | 71.1  | 0.3 | 12    | 0.1 | 2.4   | 0.2 |
| Compound <b>43</b> | 1  | 89.9  | 1.0 | 100.8 | 3.8 | 101.4 | 2.0 |
| Compound <b>43</b> | 10 | 102.3 | 8.7 | 100.8 | 3.8 | 103.3 | 1.9 |

<sup>a</sup> Values represent mean of triplicate determinations ± SD

**Table 3.** *In vitro* metabolic stability of compound **43** and midazolam using human and mouse liver microsomes

| Species               | Time, min | Mean % Remaining vs T = 0 min <sup>a,b</sup> |                          |                 |
|-----------------------|-----------|----------------------------------------------|--------------------------|-----------------|
|                       |           | 1 μM compound <b>43</b>                      | 10 μM compound <b>43</b> | 10 μM Midazolam |
| HUMAN                 | 15        | 79.4                                         | 80.4                     | 42.9            |
|                       | 30        | 62.3                                         | 74.2                     | 26.6            |
|                       | 60        | 53.4                                         | 67.2                     | 9.5             |
| HI <sup>c</sup> HUMAN | 60        | 99.3                                         | 102.6                    | 100.0           |
| MOUSE                 | 15        | 94.0                                         | 90.6                     | 20.2            |
|                       | 30        | 86.6                                         | 82.6                     | 3.0             |
|                       | 60        | 67.5                                         | 73.7                     | 0.0             |
| HI <sup>c</sup> MOUSE | 60        | 102.1                                        | 98.9                     | 108.0           |

<sup>a</sup> % remaining at T=0 is 100%

<sup>b</sup> Samples were assayed in duplicate.

<sup>c</sup> HI = Heat Inactivated

*In vitro* binding studies, broad-range screening, and hERG inhibition were carried out by the National Institute of Mental Health's Psychoactive Drug Screening Program, contract # HHSN-271-2008-00025-C (NIMH PDSP). For experimental details please refer to the PDSP web site <http://pdsp.med.unc.edu/>
